# Supplementary material for: Obtaining an immunoaffinity monolithic material: poly(GMA-co-EDMA) functionalized with an HPV-derived peptide using a thiol–maleimide reaction
Source: Royal Society of Chemistry journal article supplement (doi:10.1039/d0ra09095f), 2021-01-01
Supplement: d0ra09095f1.pdf [file d0ra09095f1.pdf]

### Supplementary material

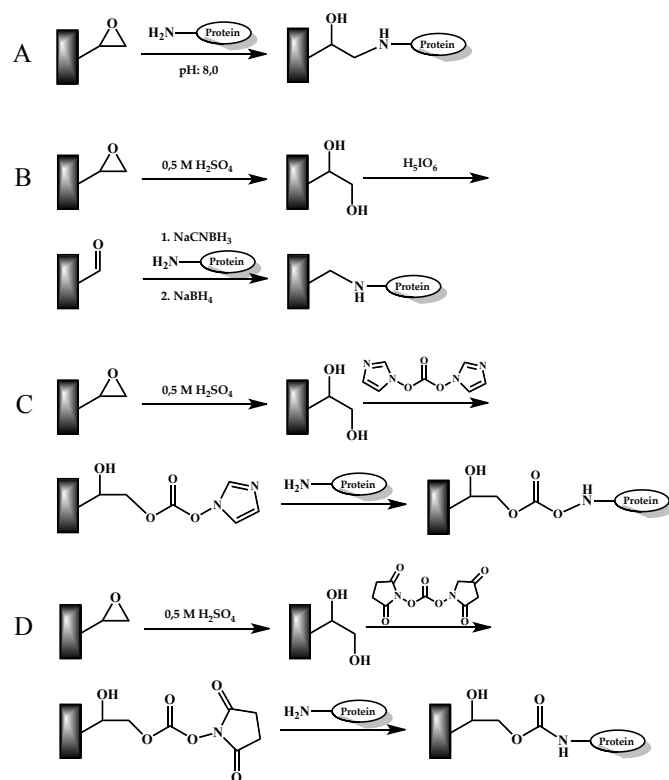

**Figure 1S.** Covalent immobilization of molecules with amino group, on *poly*(GMA-co-EDMA) monoliths. Methods of: Epoxide (A), Schiff's Base (B), Carbonyldiimidazole (C) and Disuccinimidyl (D)<sup>33</sup>.
